# Supplementary material for: Stigma, Discrimination, Treatment Effectiveness, and Policy: Public Views About Drug Addiction and Mental Illness
Source: Atypon-hosted journal article supplement (doi:10.1176/appi.ps.201400140), 2014-10-01
Supplement: 1269_ds001.pdf [file 1269_ds001.pdf]

 


Psychiatry Online
