# Supplementary material for: Stigma, Discrimination, Treatment Effectiveness, and Policy: Public Views About Drug Addiction and Mental Illness
Source: Atypon-hosted journal article supplement (doi:10.1176/appi.ps.201400140), 2014-10-01
Supplement: 1269_ds001.pdf [file 1269_ds001.pdf]

**REVIEWER APPENDIX: Un-weighted and Weighted Characteristics of GfK Knowledge Networks Survey Respondents Compared with 2013 National Current Population Survey Rates**

|                                               | Full Sample<br>Un-weighted<br>(N=709) | Full Sample<br>Weighted<br>(N=709) | Drug Addiction<br>Sample Weighted<br>(N= 347) | Mental Illness<br>Sample Weighted<br>(N= 362) | National Rates,<br>2013 CPS |
|-----------------------------------------------|---------------------------------------|------------------------------------|-----------------------------------------------|-----------------------------------------------|-----------------------------|
| <b>Individual characteristics<sup>1</sup></b> |                                       |                                    |                                               |                                               |                             |
| Female (%)                                    | 51                                    | 51                                 | 51                                            | 51                                            | 52                          |
| Age (%)                                       |                                       |                                    |                                               |                                               |                             |
| Age 18 – 24                                   | 8                                     | 10                                 | 9                                             | 11                                            | 13                          |
| Age 25 – 34                                   | 15                                    | 18                                 | 23                                            | 13                                            | 18                          |
| Age 35 – 44                                   | 15                                    | 17                                 | 15                                            | 20                                            | 17                          |
| Age 45 – 54                                   | 19                                    | 17                                 | 17                                            | 17                                            | 18                          |
| Age 55 – 64                                   | 24                                    | 21                                 | 19                                            | 24                                            | 16                          |
| Age 65 +                                      | 19                                    | 16                                 | 17                                            | 15                                            | 18                          |
| Race (%)                                      |                                       |                                    |                                               |                                               |                             |
| White only                                    | 73                                    | 66                                 | 65                                            | 68                                            | 66                          |
| Black only                                    | 10                                    | 12                                 | 12                                            | 12                                            | 12                          |
| Other                                         | 17                                    | 22                                 | 23                                            | 21                                            | 23                          |
| Hispanic Ethnicity                            |                                       |                                    |                                               |                                               |                             |
| Hispanic                                      | 9                                     | 14                                 | 15                                            | 13                                            | 15                          |
| Non-Hispanic                                  | 91                                    | 86                                 | 85                                            | 87                                            | 85                          |
| Education (%)                                 |                                       |                                    |                                               |                                               |                             |
| < high school degree                          | 8                                     | 11                                 | 12                                            | 11                                            | 13                          |
| High school degree                            | 31                                    | 30                                 | 31                                            | 30                                            | 30                          |
| Some college                                  | 29                                    | 29                                 | 28                                            | 30                                            | 29                          |
| Bachelor's degree or higher                   | 32                                    | 30                                 | 29                                            | 30                                            | 29                          |
| Household income (%)                          |                                       |                                    |                                               |                                               |                             |
| Under \$10,000                                | 7                                     | 8                                  | 8                                             | 7                                             | 5                           |
| \$10,000-24,999                               | 13                                    | 12                                 | 13                                            | 12                                            | 13                          |
| \$25,000-49,999                               | 26                                    | 26                                 | 26                                            | 26                                            | 23                          |
| \$50,000-74,999                               | 20                                    | 20                                 | 21                                            | 18                                            | 18                          |
| \$75,000                                      | 35                                    | 35                                 | 33                                            | 36                                            | 41                          |
| Employment status (%)                         |                                       |                                    |                                               |                                               |                             |

|                                            |    |    |    |    |    |
|--------------------------------------------|----|----|----|----|----|
| Employed                                   | 61 | 62 | 63 | 60 | 60 |
| Unemployed                                 | 9  | 10 | 10 | 9  | 5  |
| Retired                                    | 21 | 18 | 17 | 19 | 17 |
| Other (e.g. disabled,<br>homemaker, other) | 8  | 11 | 10 | 11 | 18 |
| Region (%)                                 |    |    |    |    |    |
| Northeast                                  | 18 | 18 | 18 | 18 | 18 |
| Midwest                                    | 24 | 22 | 21 | 22 | 21 |
| South                                      | 36 | 37 | 37 | 37 | 37 |
| West                                       | 22 | 24 | 24 | 23 | 23 |

Note: GfK KN sample weights used to calculate descriptive statistics. Comparison data extracted from the December 2013 Current Population Survey. Question wording differs for employment variable in GfK KN and CPS, therefore no comparison data provided.
